# Supplementary material for: A histone H3K4me1-specific binding protein is required for siRNA accumulation and DNA methylation at a subset of loci targeted by RNA-directed DNA methylation
Source: PubMed Central journal article supplement (PMC8184781; doi:10.1038/s41467-021-23637-4), 2021-06-07
Supplement: 41467_2021_23637_MOESM4_ESM.pdf [file 41467_2021_23637_MOESM4_ESM.pdf]

## **Description of Additional Supplementary Files**

File name: Supplementary Data 1

Description: List of DMRs in different mutants.

File name: Supplementary Data 2

Description: List of RDM15-dependent siRNA cluster regions.

File name: Supplementary Data 3

Description: RDM15 IP-MS/MS.

File name: Supplementary Data 4

Description: Data of RDM15 histone peptide array assay.
